# Supplementary material for: Maintenance and termination of the embryonic diapause in the univoltine damselfly Lestes sponsa Hansemann
Source: Research Square preprint supplement (doi:10.21203/rs.3.rs-7939953/v1), 2025-11-18
Supplement: Supplementary file 1 [file 2e6f574394edd4746c853c75.docx]

**Supplementary Information 2**

***Collections and egg pretreatment (See also Fig. 1 in text)***

**South Swedish population** **(2015 SE-1, 2016:1 and 2)**,55°45'05.4"N 13°08'08.5"E. The principal source of eggs. A small (*c*. 20 × 15 m) roadside pond just northwest of Lund, southernmost Sweden, at the time with *Typha latifolia* at the margins, surrounding submerged *Chara* mats (population B in Norling1). Sampled in 2015 and 2016.

**North Swedish population/s (2015 SE-N)**, 65°36'21.1"N 22°07'42.9"E and 65°51'05.5"N 21°27'48.3"E. Sent by mail from Poland in 2015,see2.

**Polish population/s (2015 PL)**, 53°38'18.2"N 16°22'28.1"E and 53°29'38.0"N 16°30'52.8"E. Sent by mail from Poland in 2015, see2.

Collections were made in late July and August. South Swedish females were allowed to oviposit in wet paper in uncontrolled indoor conditions, 20-25°C. After a couple of weeks, eggs were taken out of the wet oviposition substrate and stored in water.

In **2015** the south Swedish eggs were, to begin with, moved from uncontrolled conditions to late season photoperiods (LD 16:8, later LD 14:10) in a basement with minor temperature fluctuations on 14 August, 5-15 days after oviposition, still at summer temperatures (c. 20°C). At experimental start on 21 September, winter was simulated at 4.5–5°C, usually 4.7–4.8°C, but mostly referred to as 5°C, and darkness (DD) for all eggs except non-chill control groups. Darkness was briefly interrupted by ordinary room lighting at intervals when eggs were brought forward for photoperiodic treatments at a higher temperature. Acclimation was rapid, and took place during the following night. Eggs from the different females were kept separately during winter treatment.

The Polish and north Swedish eggs joined the above late-season and winter treatment on 14 and 24 August, respectively.

Probably because of a heat wave during transport, which seemed to hit the Polish eggs during a sensitive stage of pre-katatrepsis development, all eggs except 37 from two females (Table. S2:1) perished. In one of the damaged egg clutches, most embryos weirdly continued to differentiate without undergoing katatrepsis, but they ultimately died (Fig. S1:4). North Swedish eggs were in good health, but were also in short supply (110 eggs from 4 females).

In **2016**, eggs collected in late July (experiment 2016:1) were moved to LD 19.5:4.5 and c. 20°C on 30 July, 5-7 days after oviposition. However, due to a faulty switch there was a period of darkness for 15 minutes starting four hours after light-on until 8 August, when eggs were removed from the filter paper. Also, another accidental extension of the dark period occurred between 8 and 9 August, producing a 9-hour night to 9 August, roughly anticipating the change to LD 16:8 on the following day. So, on 9 August all eggs, except 66 remaining in 19.5:4.5 as long-day controls in separately light-controlled boxes, were exposed to late season photoperiods. On 23 August the long-day controls in boxes were moved to a controlled temperature of 21°C. On 15 September, experiments and winter treatments were started as above, acclimation allowed by 10°C during the following night before placement at 5°C, DD. Some eggs were winter treated at 10°C, DD.

During September some short-term deviations in temperature occurred, not exceeding 1°C.

In the separate experiment on eggs from the single female from 21 August (2016:2), the wet paper with eggs was divided in two parts immediately after oviposition (25 August). One, group A, was put directly in LD 19.5:4.5 together with the July controls to simulate midsummer photoperiods, the other, group B, was stored in the described winter-preparing photoperiods, ending in LD 14:10.

***Experimental treatments (Fig. S2:1)***

Since the collected females laid very different numbers of eggs, and eggs were in somewhat short supply, eggs for each treatment contained different numbers of eggs from each female (Table S2:1). This means that two or three females could make up for a majority of the eggs. For reasons of space, eggs had to be mixed in the same vial after winter treatment. In the main experiments 20 eggs were used per treatment in 2015, and 24 in 2016. Numbers could in some cases be different, e. g. in exploratory tests. Transfer was fast in order to avoid heating of the remaining eggs in cold storage, and sometimes an extra egg was accidentally introduced, and obviously dead eggs were sometimes taken by mistake, in particular in 2016, but soon recognized during inspections. Mortality later during experiments could sometimes further reduce numbers. I the 2015 SE-1 and PL experiments the initial numbers are shown in the results, which so also indicate long-term mortality at 21°C. In 2015 SE-N and 2016:1 only eggs surviving the shorter treatments, with low mortality, are included.

*Main experiments at 21°C*

In the **2015 SE-S** experiment, groups of 20 eggs were brought forward at intervals from winter treatment to experiments at 21°C and LL (continuous light), LD 19.5:4.5, LD 16:8 and LD 12:12, according to Fig. S2:1. These transfers took place after 0 (21 September, non-chilled control groups), 1, 2, 4, 7, 12 and 21 weeks of chilling.

After 14 weeks of chilling an extra exploratory test was added, with 16-17 eggs at LD 14.5:9.5, 16:8 and 17:7, then moved to LD 19.5:4.5 after another 14 days.

Acclimation to 21°C was allowed to take 6-7 hours, starting at 9-12 in the morning. Eggs in the non-chill control groups were transferred directly from 20°C and LD 14:10 to the above-mentioned conditions on 21 September. Eggs remained in the tested conditions until 7 March 2016 (24 weeks after 21 September), except for a viability test when 18 of the non-chill controls at 12:12 and 16:8 were moved to LD 19.5:4.5 after 12 weeks of high-temperature diapause. To test final survival, all remaining eggs at 21°C were subjected to LD 20:4 on 7 March, 24 weeks (168 days) after chill start on 21 September. On 18 April, 6 weeks later, all was terminated, and the remaining eggs were evidently dead and mostly discoloured, and no hatching was attempted during the last three weeks.

The few eggs from the two Polish females (PL) were tested after 4, 7 and 12 weeks in groups of 12-13 eggs at LD 16:8 only.


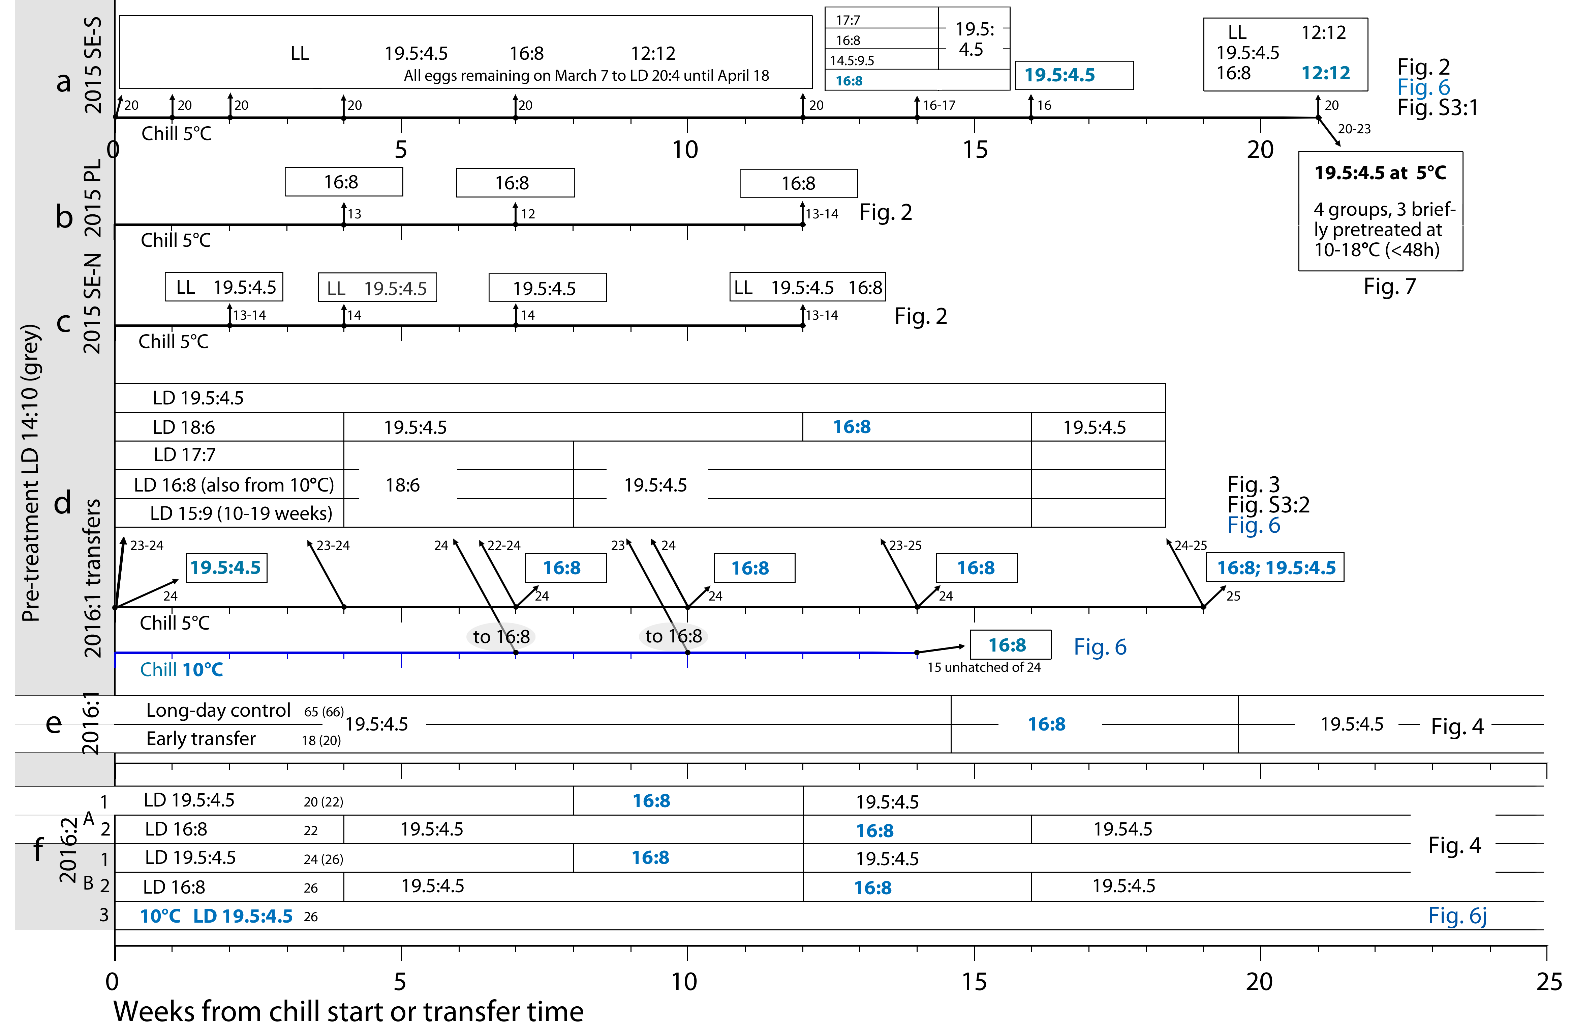


**Figure S2:1.** Continuation of Fig.1 (in text) from the vertical solid lines.Graphic overview of treatments after pretreatment and chilling, including control groups. The last photoperiod during pretreatment is indicated to the left: grey LD 14:10, white LD 19.5:4.5. Chilling is represented by horizontal time scales. The timing of removals from chilling are shown with arrows directed to boxes with relevant photoperiods. Figures in black represent 21°C, and blue 10°C. Two of the boxes (in a and d), show the temporal scale of subsequent transfers after removals from chilling. The actual placement of the box in d) is that of the non-chill controls. Here, all except one egg hatched in the first LD 19.5:4.5 photoperiod. Numbers of eggs in the transitions are shown with smaller font at the arrows, initial numbers in a-b, surviving eggs in c-d, and both in e-f. References to graphs containing corresponding results are shown to the right. The viability check of non-chill diapause eggs after 12 weeks in 2015 SE-S is not shown.

Eggs from northern Sweden (SE-N) were used in groups of 13-14 eggs, and photoperiods and chilling were based on previous experiments on these populations3, shown in Fig. 2j, col 8 and Fig. S5:3d). LL and LD 19.5:4.5 after 2, 4, 7, and 12 weeks were examined. However, due to initial results eggs intended for the 7 weeks LL group were instead tested at LD 16:8 after 12 weeks.

In **2016:1**, as described above, 66 eggs (65 surviving) in the 23-25 July collection continued with LD 19.5:4.5 directly after the initially disturbed long-day photoperiod (9 August), as an early long-day control group. On 25 Aug., an early non-chill transfer of 20 eggs (18 surviving) in autumn preparations (16 days of LD 16:8) to LD 19.5:4.5, were performed.

Otherwise, at experimental start on 15 September, groups of 24 eggs were treated similarly to those from 2015, but with winter treatments of 0 (non-chill controls), 4, 7, 10, 14 and 19 weeks, and to photoperiods of LD 19.5:4.5, 18:6, 17:7 and 16:8. Transfers to 21°C was made at mid-day with 6-7 hours acclimation. In the groups run after 10, 14 and 19 weeks, LD 15:9 was added because of some unexpected hatching in LD 16:8 after 7 weeks.

To prevent accumulation of eggs in diapause at high temperature, occupying valuable space and causing mortality (cf.4), eggs entered a transfer pattern shown in Fig S2:1d. Eggs remaining in diapause after 4 weeks in the initial photoperiods of LD 15:9 to 17:7 were transferred to LD 18:6 for another 4 weeks. All eggs still remaining after 4 weeks in 18:6 were moved to LD 19.5:4.5 for 8 weeks. After this, a sole remaining egg was brought to 10°C, LD 16:8, and then back, according to Fig S2:1d. These transfers also allowed a check for viable eggs avoiding the increased mortality during long term high-temperature diapause observed in the previous year. This simultaneously produced valuable data on the effects of previous chilling on termination in remaining diapausing eggs by long-day photoperiods when temporally separated from the end-of-chilling.

Also remaining eggs from 2016:1 and 2 in LD 19.5:4.5 in the long-day control and the early transfer, and in 2016:2 described below, were finally treated with a period of LD 16:8 at 10°C followed by a return to previous LD 19.5:4.5 (Fig S2:1 e-f). End-of experiment was on 16 March 2017, 26 weeks from chill start.

In **2016:2**, an exploratory non-chill test on eggs from the single female from 21 August 2016, both the A group initially in LD 19.5:4.5 and the B group in winter preparing photoperiods (Fig.1), entered a transfer pattern of subgroups of 22-26 eggs to LD 16:8 and LD 19.5:4.5 according to Fig S:2:1f and Fig. 4c-f and 6a, starting on 15 September, 25 days after collection.

As 10°C probably allowed faster diapause development, a limited test of wintering at 10°C and DD was performed on three batches of eggs parallel to the 5°C chilling in 2016:2, and tested at LD 16:8, two at 21°C after 7 and 10 weeks, but the 14-week group remained at 10°C due to premature hatching.

***Exploratory tests of hatching at lower temperatures***

*10°C*

Some exploratory tests at this temperature after chilling, in parallel with the 21°C experiments, were performed on south Swedish material in 2015 SE-S (Fig. S2:1a), and continued more systematically in 2016:1 (Fig S2:1d). In 2015 LD 16:8 at 10°C was tested after 14 weeks of 5°C, LD 19.5:4.5 after 16 weeks, and LD 12:12 after 21 weeks. In 2016, tests at LD 16:8 and at 10°C were made after 7, 10, 14, and 19 weeks, and LD 19.5:4.5 was tested after 0 and 19 weeks of chilling. The design was based on the hypothesis that the lower temperature would magnify the diapause-maintaining effect of photoperiod. Since no eggs hatched at 21° and LD 16:8 after 7 weeks chill in 2015 SE-S, no shorter chill times were used here.

*5°C*

After the end of the 2015 SE-S chilling experiments, remaining eggs after 21 weeks at 5° and DD (15 February) were given LD 19.5:4.5 for a test of hatching abilities at low temperatures, also after some brief pre-treatment at 10-18° C to initiate development: 24 surviving eggs just remained at 5°C, 20 eggs got a continuous period of 10°C for about 30 hours, 20 got 18°C for 18 hours with transitional periods of 10°C before and after for totally c. 11 hours, and finally 21 eggs got 18°C for 40 hours and transitional 10°C for totally c. 8 hours. In the latter group 2 eggs hatched just before being brought back to 5°C.

*Hatchling survival at low temperatures*

The ability of hatchlings to survive low temperatures were first tested by moving some larvae to water at 4-5°C for different times, but no mortality except from cannibalism was observed (larvae were not fed). Then water near the freezing point (0-1°C) was tried for various times, hours up to about three weeks. Before chilling, larvae were stored at 10°C for some hours up to a day. Viability was observed at 10-18° one day after end-of-chilling.

***Equipment***

The main experiments were performed at 21°C, which was maintained in a 24 liters cooling box (Tristar KB-7224, 12V 5A), extensively modified with a temperature sensor and reduced cooling capacity, balanced heating provided by resistors associated with the fan and a custom-built regulator. Eggs were kept in small 10 ml or 25 ml plastic cups, which were placed inside metal tea boxes (85 x 85 mm, 110 mm high) with reflective inside walls and a matte white plastic sheet on the bottom for easy observations. The tea boxes were placed on an elevated grid and with spacers, allowing free circulation of air around them. Light was provided by a 1-watt white LED (hexagonal star-type ESH-350WPC006, 3000K, 100 lm at 350 mA) run at 18 mA, giving a power consumption of about 50 mW. In addition, it was mounted above a hole in the lid and with the hexagonal 20mm aluminum cooling plate placed in free air outside the box. This should ensure that little more than the light energy entered the interior with the eggs. Photoperiod was controlled by commercial electrical switches. The space allowed six tea boxes, limiting the experiment. This piece of equipment, run on 12 V, was brought along during field absence 6 – 13 Oct. 2015, and 26 Aug. – 2 Sept., 19 – 24 Sept and 7 – 12 Oct. 2016. During transport temperature could sometimes very briefly reach 22°C.

The 10° experiments, including winter treatment at this temperature, were performed in another similarly rebuilt and temperature-controlled cooling box (Rubicson 12V, 4A, volume 24 liters), eggs housed in tea boxes as above.

Winter treatment at 5(4.7-4.8)°C took place in a rebuilt smaller cooler (Jula Hamron 604-023, 12v, 2.5-3.5A, volume 5 liters), where the Peltier element was attached to an aluminum tray forming the bottom and lower walls. This was used as a temperature-controlled water bath, where 30 ml vials containing eggs were placed on a grid, below which a small propeller circulated the water. Two standard 20 mA white LED:s were sufficient as a light source when testing low temperature hatching.

For test of cold resistance in hatchlings another Jula Hamron cooler (see above) was used, and put on top of a magnetic stirrer. It was filled with about 5 cm of water and a 70mm magnet was placed on the bottom and rotated at low speed for mixing. Vials were placed on a grid above the bottom, making place for the magnet. An insulating layer of ice was forming near the attachment of the Peltier element to the aluminium tray and the thickness of this layer automatically regulated the water temperature to near the freezing point. Cold tolerance hatchlings were not fed, although they could attack each other at 4-5°C.

**Table S2:1**. Egg distribution.

| 2015 PL | Coll. date | Eggs/standard group |
| --- | --- | --- |
| Tyc 25 | 5 Aug | 8-9 |
| Tyc 35 | 7 Aug | 3-4 |
|  |  |  |
| 2015 SE-N |  |  |
| Bod 27 | 12 Aug | 4-5 |
| Lul 77 | 12 Aug | 3-4 (2 in LL, 12 weeks) |
| Bod 25 | 13 Aug | 2-3 |
| Lul 115 | 14 Aug | 3-4 |
|  |  |  |
| 2015 SE-S |  |  |
| R1 | 30 July | 5 |
| R2 | 30 July | 4 |
| R3 | 30 July | 2 |
| O1 | 7 Aug | 5 |
| O2 | 7 Aug | 2 |
| O3 | 9 Aug | 1 |
| O45 | 7 Aug | 1 |
| Sum SE-S |  | 20 |

The above composition was approximated in the groups with 16 specimens. The final low-temperature groups after 21 weeks were, however, different, since they were composed of “leftover” specimens.

| 2016:1 (SE) | Coll. date | Eggs/standard group | Long-day control | Early transfer 25 Aug |
| --- | --- | --- | --- | --- |
| 1 | 23 July | 3 | 6 | 0 |
| 2 | 23 July | 2 | 6 | 0 |
| 3 | 23 July | 1 | 4 | 0 |
| 4 | 23 July | 7 | 20 | 10 |
| 5 | 25 July | 8 | 20 | 10 |
| 6 | 25 July | 2 | 6 | 0 |
| 7 | 25 July | 1 | 6 | 0 |
| Sum 2016:1 |  | 24 | 68 | 20 |

Standard transfers after 19 weeks had partly a slightly different composition, but here hatching was extremely fast and uniform.

Note that the presented figures do not take initial bad eggs, subsequent mortality and mistakes in distribution into account. Therefore, numbers may differ slightly from those stated elsewhere.

**References**

1. Norling, U. Constant and shifting photoperiods as seasonal cues during larval development of the univoltine damselfly *Lestes sponsa* (Odonata: Lestidae). *Int J Odonatol* **21**, 129–150 (2018).

2. Sniegula, S., Janssens, L. & Stoks, R. Integrating multiple stressors across life stages and latitudes: Combined and delayed effects of an egg heat wave and larval pesticide exposure in a damselfly. *Aquat Toxicol* **186**, 113–122 (2017).

3. Sniegula, S., Golab, M. J. & Johansson, F. Time constraint effects on phenology and life history synchrony in a damselfly along a latitudinal gradient. *Oikos* **125**, 414–423 (2016).

4. Sawchyn, W. & Church, N. The effects of temperature and photoperiod on diapause development in the eggs of four species of *Lestes* (Odonata: Zygoptera). *Can J Zool* **51**, 1257–1265 (1973).
