# Supplementary material for: Maintenance and termination of the embryonic diapause in the univoltine damselfly Lestes sponsa Hansemann
Source: Research Square preprint supplement (doi:10.21203/rs.3.rs-7939953/v1), 2025-11-18
Supplement: Supplementary file 3 [file b7590bb8421f17b249359d7f.docx]

**Supplement Information 5**

Overview of hatching responses to photoperiod and temperature in *Lestes sponsa* from data underlying previously published papers, and some recent unpublished material: an analysis using the findings from the present study.

1. Long days can terminate diapause at any time, but least effectively and extremely asynchronously (during weeks, even months) soon after diapause start 2-3 weeks after oviposition.
2. High temperature diapause development under late-season photoperiods is very slow, but increases hatching synchrony at subsequent long-day exposure. First hatch often later than 5 days at 21°C.
3. Diapause development is faster at 5°C, and still faster at 10°C.
4. Chilling duration accelerates hatching, increases synchrony and hatching incidence at subsequent summer temperatures, and decreases critical photoperiod. After c. 20 weeks of chilling, photoperiod appears almost irrelevant, and hatching can start after two days at 21°C.
5. The increase in experimental temperature from winter to summer temperatures facilitates photoperiodic termination for a short period, i.e. it contributes to termination. In remaining diapause eggs at summer temperature, diapause development appears to temporally reverse at the higher temperature, and subsequent termination by long-day exposure is slower.
6. A post-chill temperature of 10°C seems to allow simultaneous faster diapause development, reducing laggards and increasing hatching incidence compared to 21°C. Even after c. 20 weeks of previous chilling, some effects of photoperiod on hatching time remain.
7. Post-diapause development at 10°C is 3-3.5 times slower than at 21°C, and at 5°C, probably close to the threshold, it appears to be roughly 20 times slower.
8. Hatching is successful at 5°C.
9. Overwintering in post-diapause development seems possible, giving extra early hatching.

However, some features remain unexplained, and poses further questions.

Post-diapause developmental rates estimated for different temperatures below are calculated linearly from a threshold temperature of 5°C. It must be stressed that these values are quite speculative.

**Some observations from these data.**

Short wintering (4 weeks or less) does not make southern populations ready to hatch at normal spring photoperiods (5:1, 5:2, 5:3), but unnatural long days can still allow fast and synchronous hatching (5:2b, 5:3d).

Northern populations have a longer critical photoperiod, and hatch later than southern populations under the same photoperiodic regimes after short wintering (5:1, 5:2, 5:3d, 5:4).

A winter treatment at 7°C for 11-12 weeks can initiate post-diapause development, but does not seem to start hatching (5:4), whereas 22 weeks allow considerable winter hatching (5:6).

Longer time in high-temperature diapause produces hatching in shorter days (5:1a).

Also, after a long winter, northern populations hatch earlier than more southern ones (5:4), possibly still reacting to photoperiod, but this experiment started at 11°C, and could rather include faster diapause development and weaker diapause.

Contrary to expectations, populations from 60°N were surprisingly slow (5:4c, 5:5), and slower than Polish ones from 54°N, and hatched less at 7°C, and not at all during a long 6°C winter (5:5a).

**Explanation to the following subfigures in Fig. S5**. Post-chill hatching patterns in populations of *Lestes sponsa*, mainly from Sweden and Poland. Hatchings per day are shown as histograms with scale bar to the right, in Fig. S5:5 and 5:6 also as parallel cumulative graphs. The Y-axis indicates both temperature (black lines) and photoperiod (grey lines). Horizontal and vertical help lines are added to allow precise correlation with changes in photoperiod/temperature and the progress of hatching. In addition, for easy comparison, hours of light (daylength/photophase) are shown for important intervals during hatching above the histograms. Populations in “native” conditions are shown in bold.

Figure S5:1 – Short winter (2 weeks), natural photoperiods (no twilight), constant summer temperature. Reciprocal Polish/Swedish populations/photoperiods (PL 54°N, SE 64°N). Sniegula & Johansson1 – page 3

Figure S5:2 – Short winter (11 days), natural photoperiod (half civil twilight), constant summer temperature. Reciprocal Polish/North Swedish populations/photoperiods (PL 54°N, SE 66-67°N). Sniegula et al.2 – page 4

Figure S5:3 – Short winter (4 weeks), natural temperatures and photoperiods (civil twilight), and common-garden constant conditions for three populations. Sniegula et al.3 – page 6-8

S5:3a France (F 43°N) – page 6

S5:3b Poland (PL 54°N) – page 7

S5:3c North Sweden (SE 66°N) – page 7

S5:3d All three populations in constant 19.4h, 21.8°C – page 8

Figure S5:4 – Long winter (11-12 weeks) at 7°C, natural temperatures and photoperiods (civil twilight). Reciprocal Polish/North Swedish populations/photoperiods (PL 54°N, SE 66°N) and a central Swedish population/photoperiod (SE 60°N). Johansson et al.4 – page 9

Figure S5:5 – Long winter (22-26 weeks) at 6-7°C, the latter with premature hatching. Constant 20 and 10°C. Data from 2025. Population from Uppsala/central Sweden (SE 60°N). – page 11

Figure S5:6 – Long winter (22 weeks) at 7°C, with premature hatching. Fast and slow spring temperature rise at a 14h daylength. Data from 2025. Population from Poland (PL 54°N). – page 12


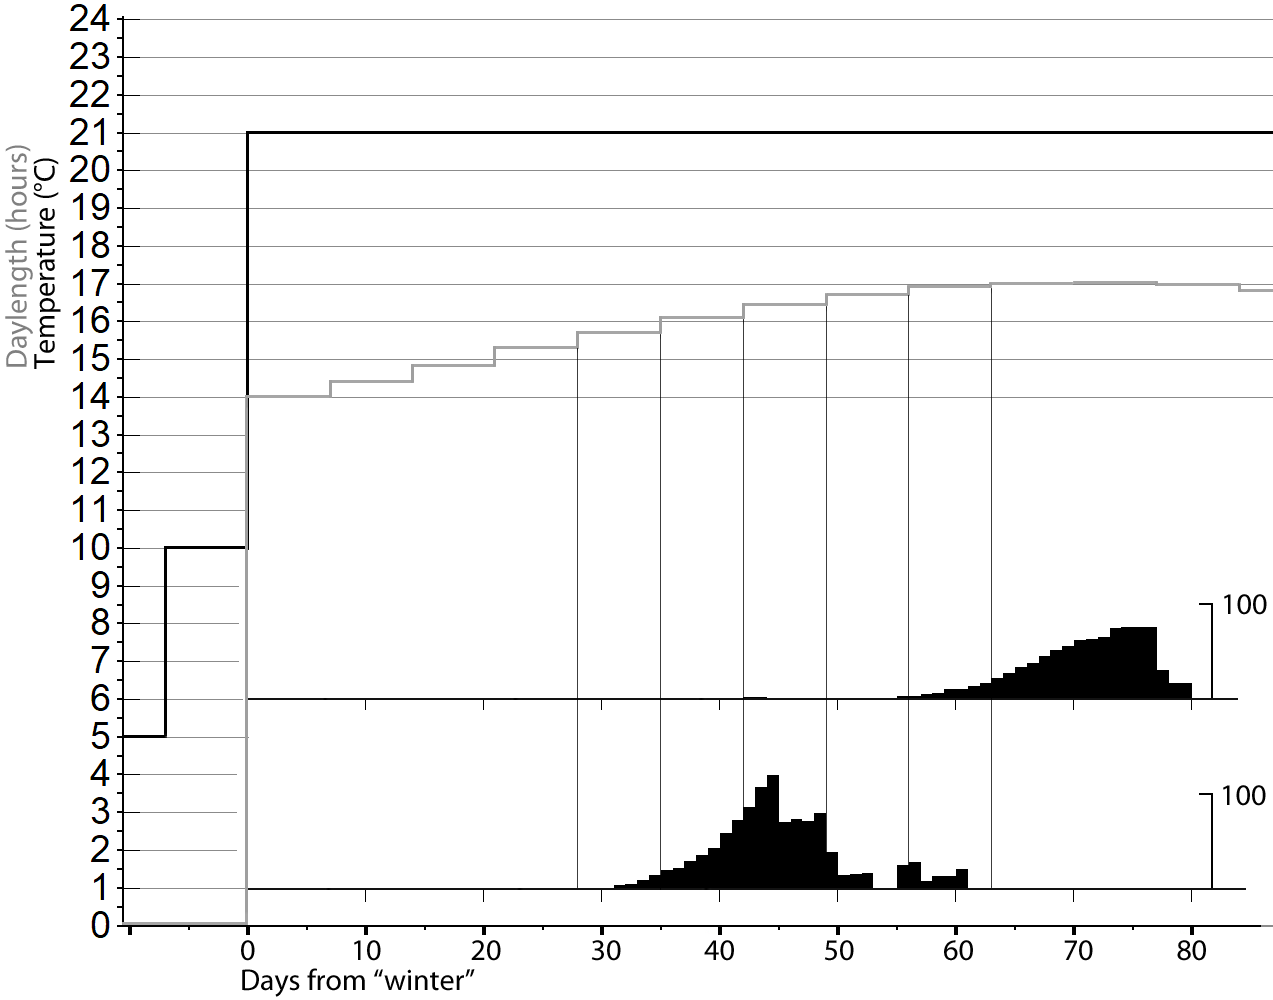


15.7 16.1 16.9 17.0

**S5:1a** photoperiod PL 54°N

**Pop. PL 54°N**

Pop. SE 64°N


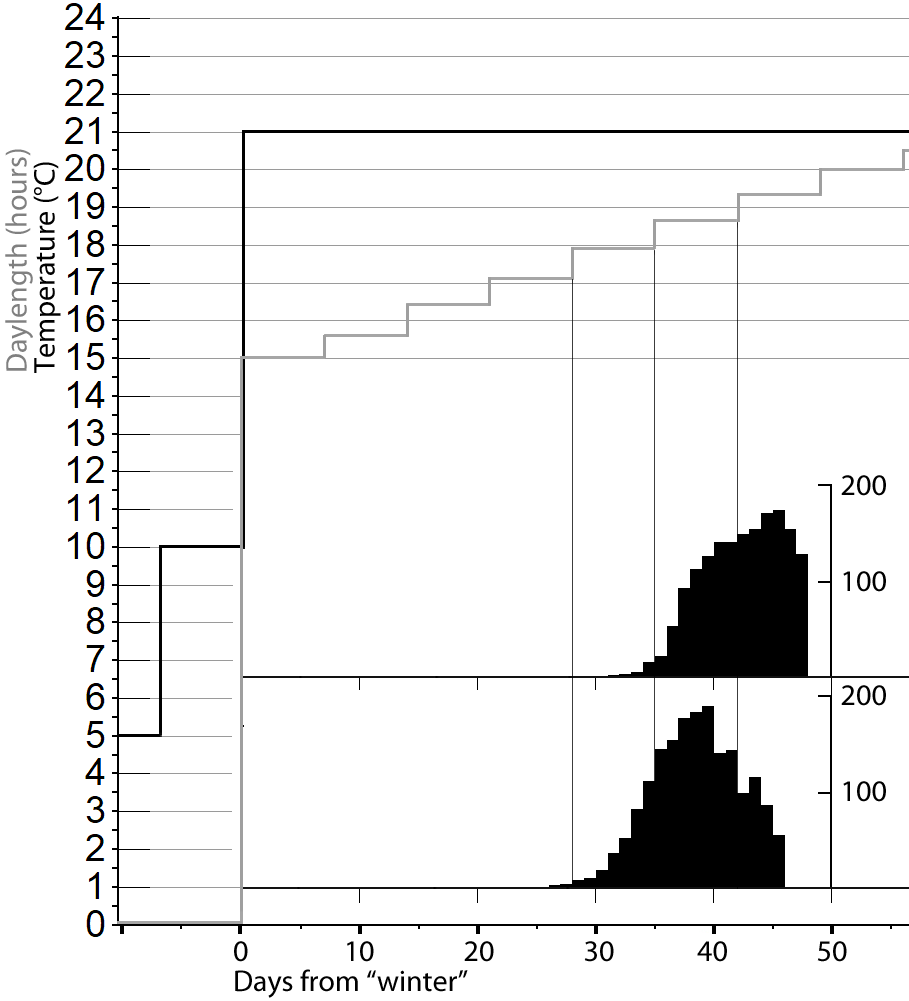


17.1 17.9 18.7

Pop. PL 54°N

**Pop. SE 64°N**

**S5:1b** photoperiod SE 63.8°N

**Fig. S5:1.** Data underlying Sniegula and Johansson1. Short winter (2 weeks), natural photoperiods (no twilight), constant summer temperature. Reciprocal Polish/Swedish populations/photoperiods. Recording of hatchings truncated when sufficient number of hatchlings was obtained.

**Collection**: 1-12/8 2008 (PL first, then SE); 18-29 days at 21°C, c. natural photoperiod (no twilight). Thus, no or little time in high-temperature diapause. **Wintering**:30/8 2008 to DD, 5°C one week; 6/9 2008 to 10°C, DD one week (shown in graph), totally two weeks.

**Comments**: Rather strong delays typical for low level of diapause development after short chilling. Hatching is to a great extent triggered after photoperiodic activation, but also some slow diapause development at high temperature should contribute.

In **PL photoperiod,** PL population hatched as expected much faster than SE, but still strongly delayed (hatch start at c. 16h and 17h, respectively, the latter near “solstice”). SE population showing a delay not too different from 2015 SE-S at 16h (Fig. S3:1).

In **SE photoperiod** both populations displayed surprisingly similar delays, PL was only marginally faster than SE (hatch start at c. 18h and 18.7h, respectively), which is surprising. Both populations show similar timing in native photoperiods, but hatch at different photoperiods (c. 16 and 18h). Overall, different critical photoperiods are supported, affected by diapause time in short days.


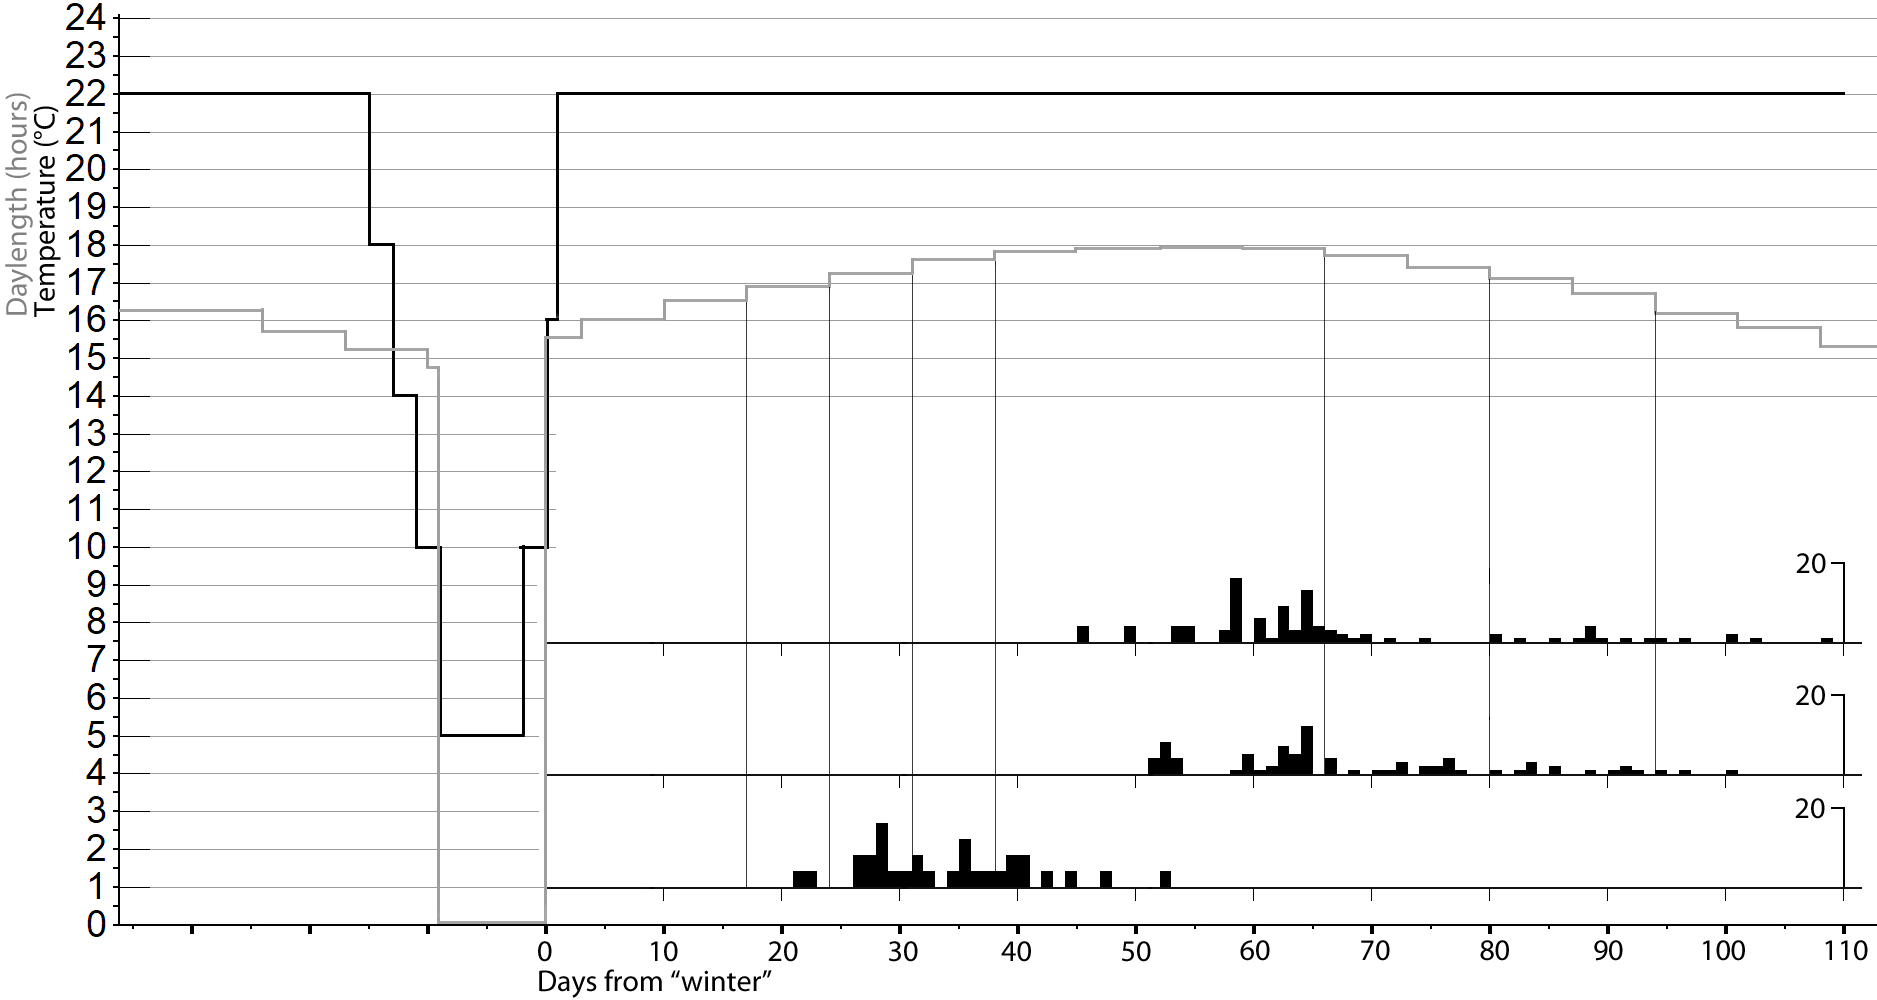


16.9 17.3 17.9 15.8

Pop. SE 67°N

**Pop. PL 54°N**

Pop. SE 66°N

**S5:2a** photoperiod PL 54°N


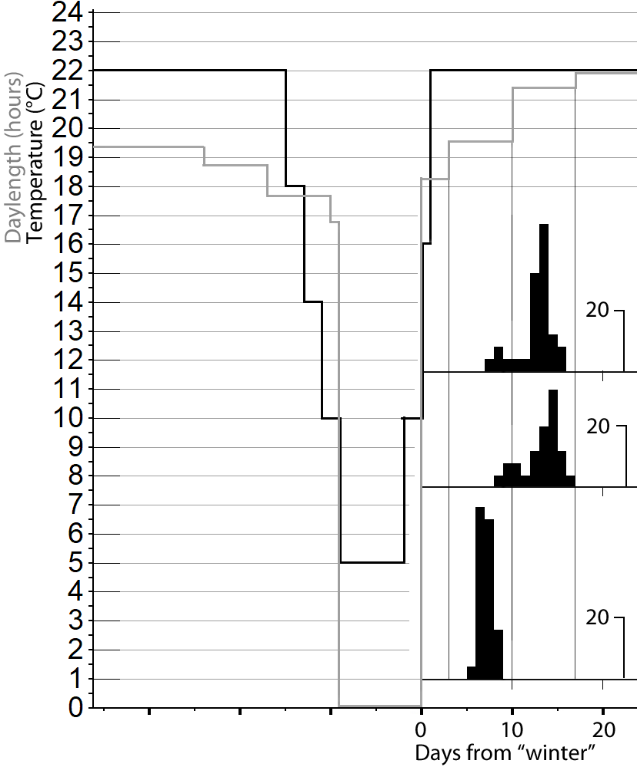


19.6 21.4

Pop. PL 54°N

**Pop. SE 67°N**

**Pop. SE 66°N**

**S5:2b** photoperiod SE 66°N

**Fig. S5:2.** Data underlying Sniegula et al.2. Wintering included in the graph. Short winter (11 days), natural photoperiod (half civil twilight), constant summer temperature. Reciprocal Polish/North Swedish populations/photoperiods.

**Collection**: 25/7-8/8 2012. 18-32 days (different between populations) with natural photoperiod (half civil twilight) and 22°C, and so, little time in high-temperature diapause, in particular for SE populations. **Wintering**: DD 5°C 28/8 one week. Two + two days at 10°C before and after, totally 11 days.

**Comments:** Results somewhat similar to S5:1. However, slightly higher temperature, and longer days from twilight addition, and, in particular, SE populations from a higher latitude and so longer SE photoperiods, making hatching earlier. **Also, later spring starting date**.

Again, photoperiodic activation**, PL photoperiod** with overall slow asynchronous hatching, with outcome reminding of that in S5:1a, but slightly earlier. PL population hatching during 17-18h, SE at 18h and shorter, mainly in decreasing post-“solstice” photoperiods, probably largely driven by diapause development.

PL population in the longer and faster-increasing **SE photoperiod** (S5:2b) hatch quite fast and synchronously, but still typical for long-day activation (18-19.5h; cf. initial part of Fig. 2c, col. 1-2). This demonstrates high synchrony at extreme long-days after brief chilling. The SE populations are slightly slower, the early photoperiod of 19.5h is apparently near-critical with slow hatching start, but later a peak after some days at 21.4h. This is a rather similar, but initially slightly slower start as in Fig 2i col.7, where chilling and initial conditions were similar, but with longer preceding high temperature diapause. Hatching would likely have been more protracted if the photoperiod had not increased - less preceding high temperature diapause. The response to photoperiod in the second peak, if this is the case, is remarkably fast.

Compared to S5:1, PL hatch earlier and at longer days, SE similarly, but represent more northern populations.

**Fig. S5:3a-d.** Data underlying Sniegula et al.3. Short winter (4 weeks), natural temperatures and photoperiods (civil twilight), and common-garden constant conditions. French, Polish and north Swedish populations.


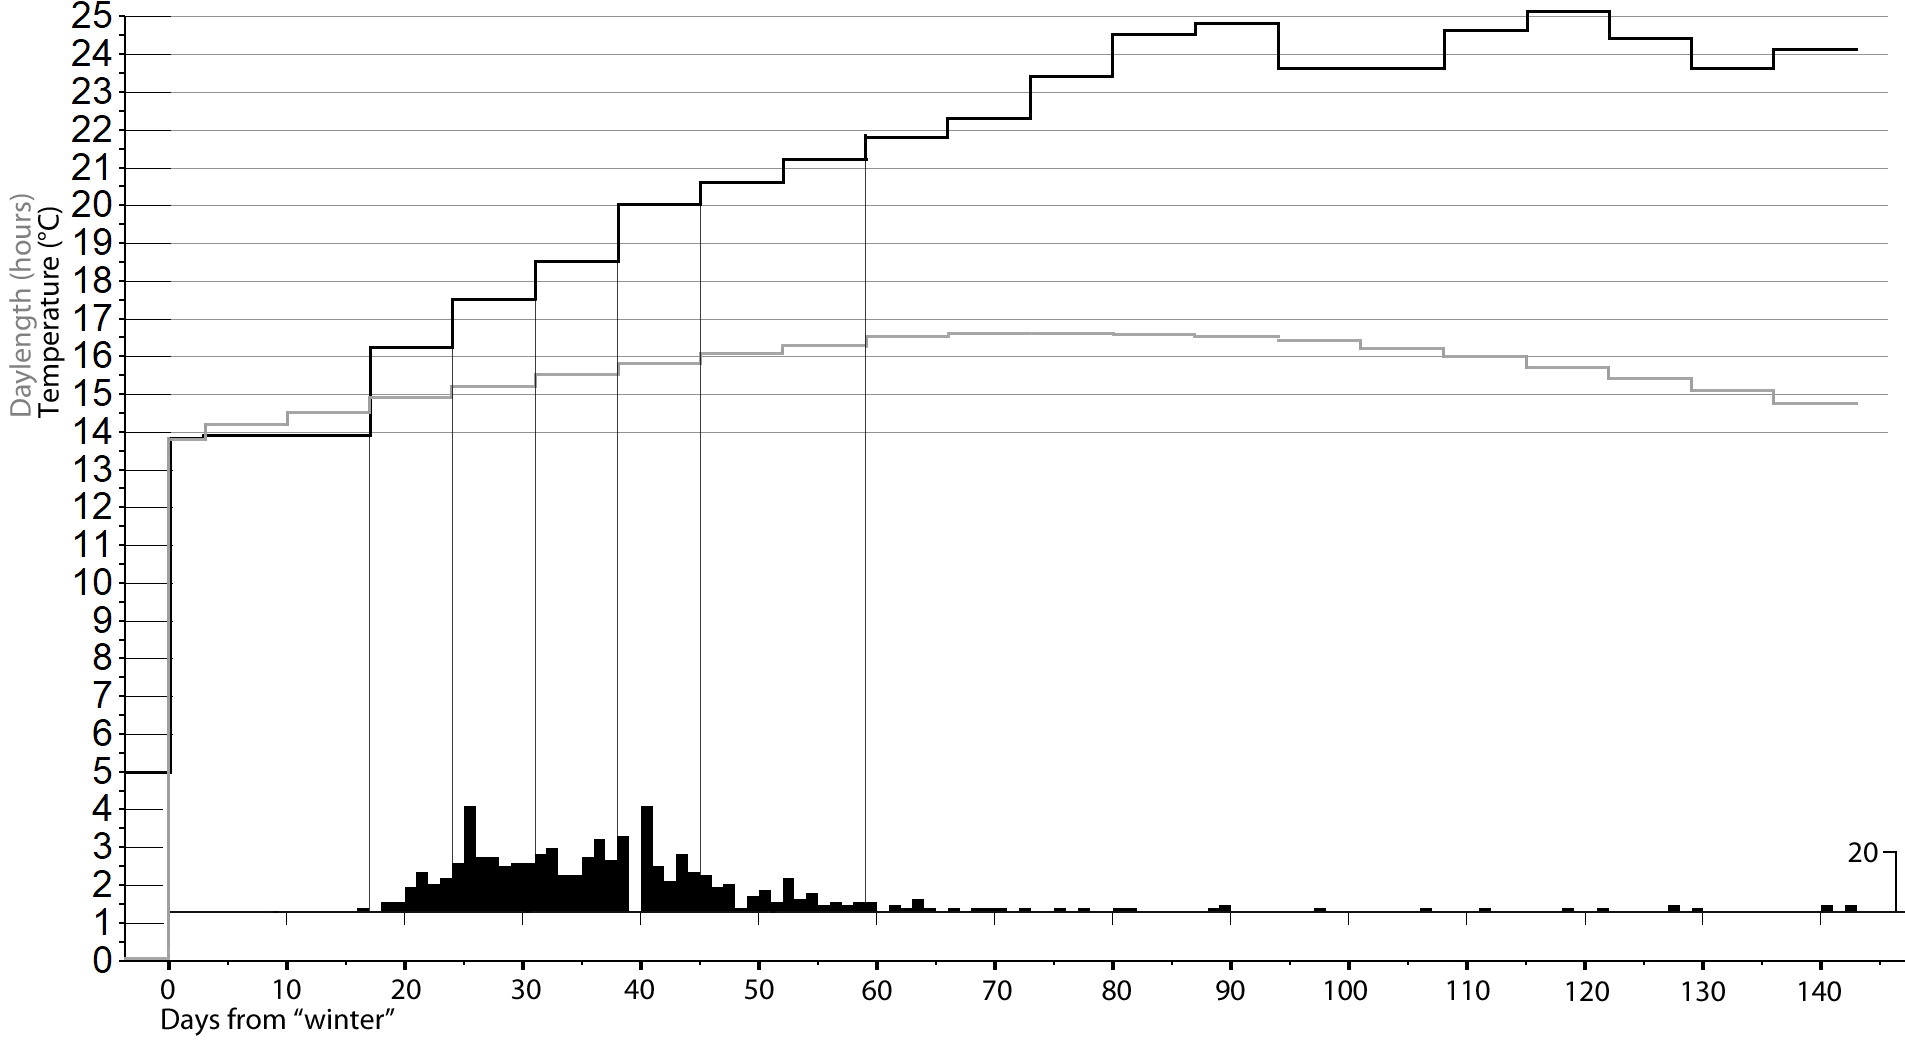


14.9 15.2 15.5 15.8 16.3 16.6 14.8

**S5:3a** photoperiod/temp F 43°N

**Pop. F 43°N**

Cf. Fig 3c in Sniegula et al.3

**S5:3a**, France, 43°N. **Collection**: 29/6-2/7 2013. Natural photoperiod and temperature (16.5h, 24.8°C). Started hatching after about 2 weeks, then chilled immediately. **Wintering**: chilled at 5°C for 4 weeks, DD.

**Comments**: Late start of asynchronous hatching (hatch mainly during 15-16h at 16-20°C) suggests very incomplete diapause development. Post-diapause development at the initial 14°C may require about 4-5 days, but may also allow relatively fast diapause development. Since hatching started before chilling, some eggs should have spent “winter” in post-diapause development, but signs of this – early hatching – is lacking completely (compare with Fig. S5:4-6). Either there were no postdiapause eggs, or such eggs died or hatched during wintering, but 4 weeks chill is rather short. The very late hatching in some eggs, even during the late-summer decreasing photoperiods, may relate to a very intense diapause and prolonged survival in high temperature diapause.


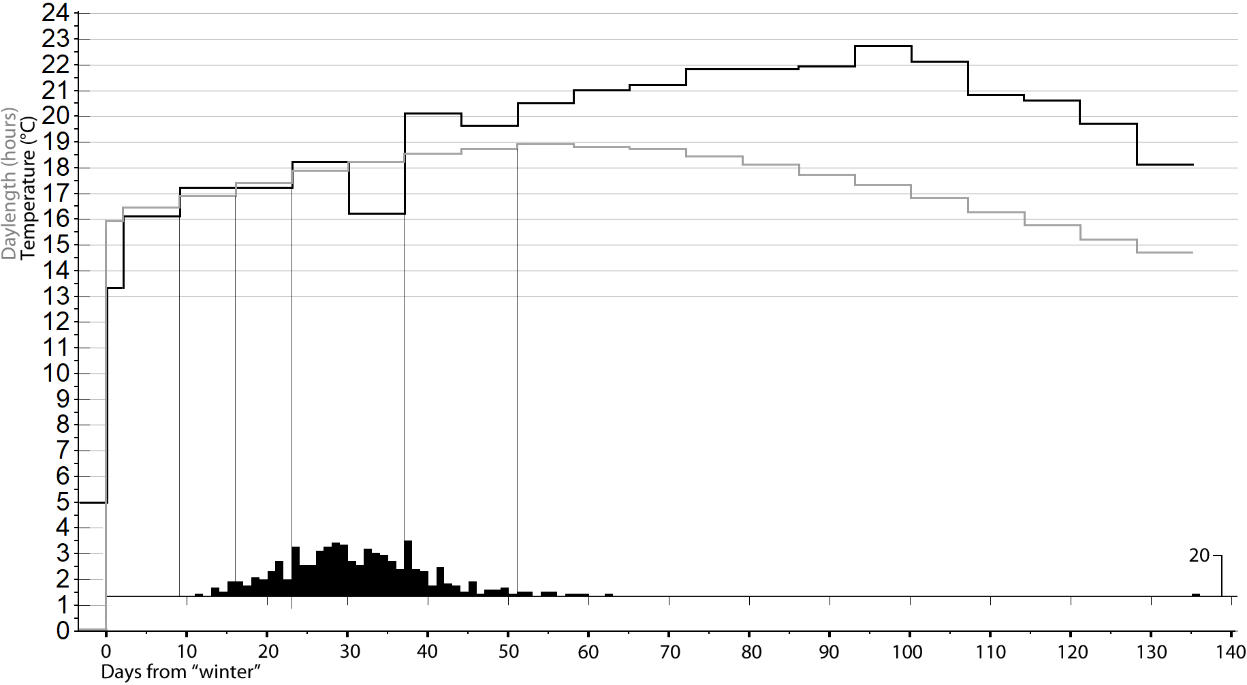


16.9 17.4 17.9 18.2 18.7 18.9

**S5:3b** photoperiod/temp PL 54°N

**Pop. PL 54°N**

Cf. Fig 3b in Sniegula et al.3

**S5:3b**, Poland, 54°N. **Collection**: 23-28/7 2013. Natural photoperiod and temp. (17.6h, 21°C) for 3 weeks – little high-temperature diapause. **Wintering**: 5°C for 4 weeks, DD, after one day at 15°C.

**Comments**: As above, late asynchronous hatching (hatch mainly during 17-18.5h at 16-20°C) suggest incomplete diapause development and successive photoperiodic activation. Hatching at similar photoperiods as in S5:1b, but temporally much earlier despite lower temperatures, but the end of hatching is still around the summer solstice. However, longer wintering and perhaps some faster diapause development could have contributed (possible high temperature reversal of diapause development in the slower S5:1).


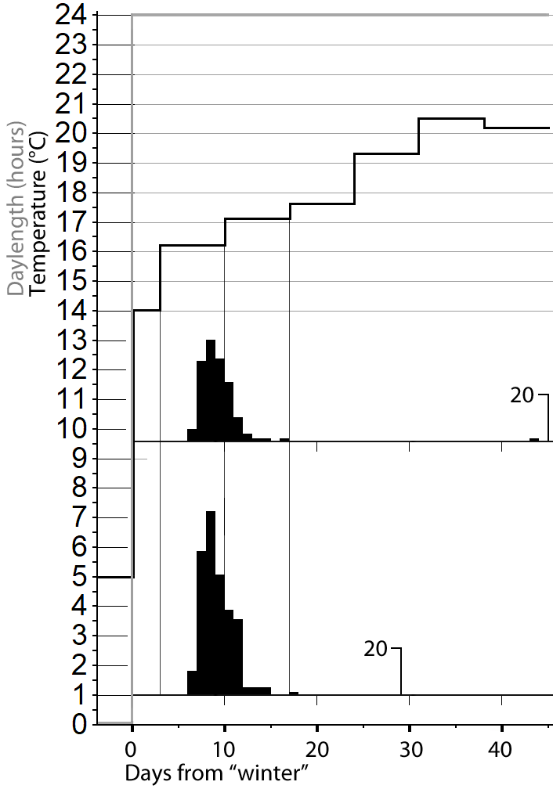


24.0

**S5:3c** photoperiod/temp SE 66°N

Cf. Fig 3a in Sniegula et al.3

**Pop.2, SE 66°N**

**Pop. 1, SE 66°N**

**S5:3c**, Sweden, 66°N. **Collection**: 6-10/8 2013. Natural photoperiod and temp. (21h, 19.2°C) for 3 weeks, so little time in high-temperature diapause. **Wintering**: 5°C, DD, for 4 weeks after one day at 15°C.

**Comments**: Start of hatching equivalent to about 4, perhaps 5 days at 21°C. Photoperiodic activation in LL after incomplete diapause development thus likely. If temperature-corrected, it is similar to Fig 2i, col. 6 (2 weeks chill, preceded by a 2-3 weeks longer high-temperature diapause).


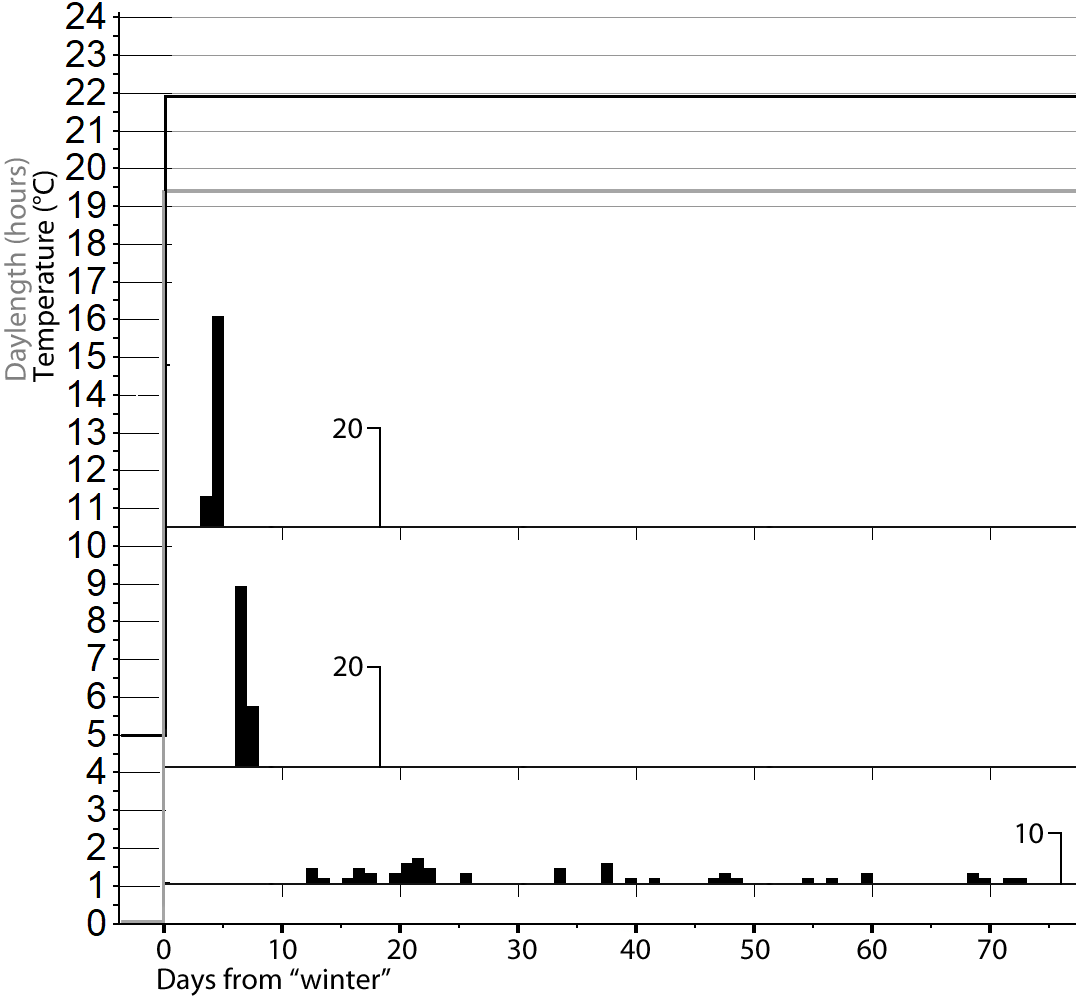


19.4

Pop. F 43°N

**S5:3d** photoperiod/temp constant-average

Cf. Fig 3g-i in Sniegula et al.3

Merged pops. SE 66°N

Pop. PL 54°N

**S5:3d**, Averaged constant conditions, all populations. Pretreatment for different populations, see above.

**Comments**: F remarkably, even unnaturally early and synchronous, but must be strongly activated by the extreme photoperiod for this latitude. PL is also extremely synchronous, but the later start is reasonable for photoperiodic activation, quite similar to S5:2b with similar initial conditions. SE (also shown in Fig. 2j, col. 8) is clearly delayed, probably in a near-critical photoperiod (19.4h). Despite longer chilling and similar initial conditions, hatching start is somewhat later than in Fig. S5:2b. It is also slower than after the similar four-week chill in Fig 2j, col. 7, and even slower than after 2 weeks chill in Fig 2i, col. 7, both with 2-3 weeks longer periods of high temperature diapause than here.


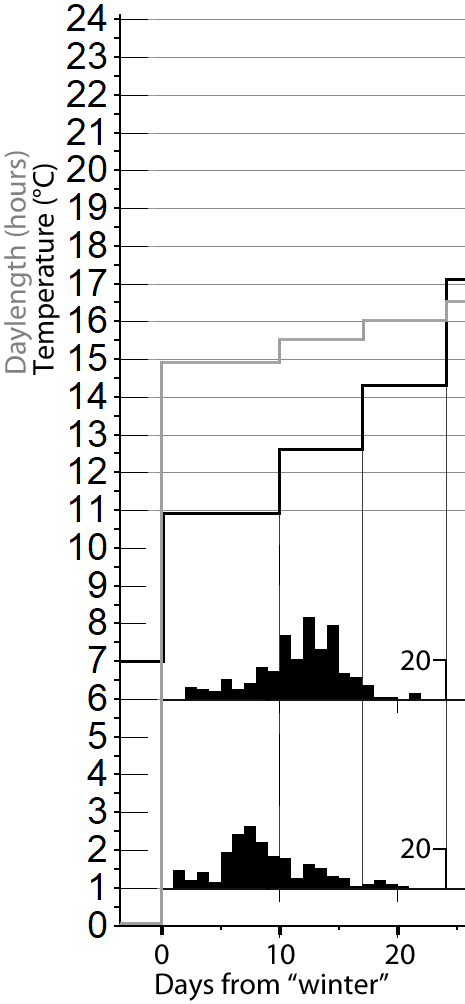

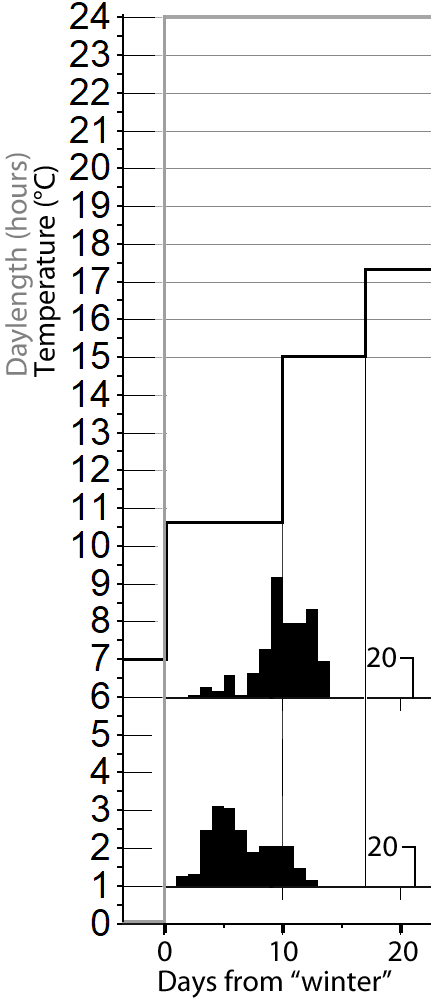

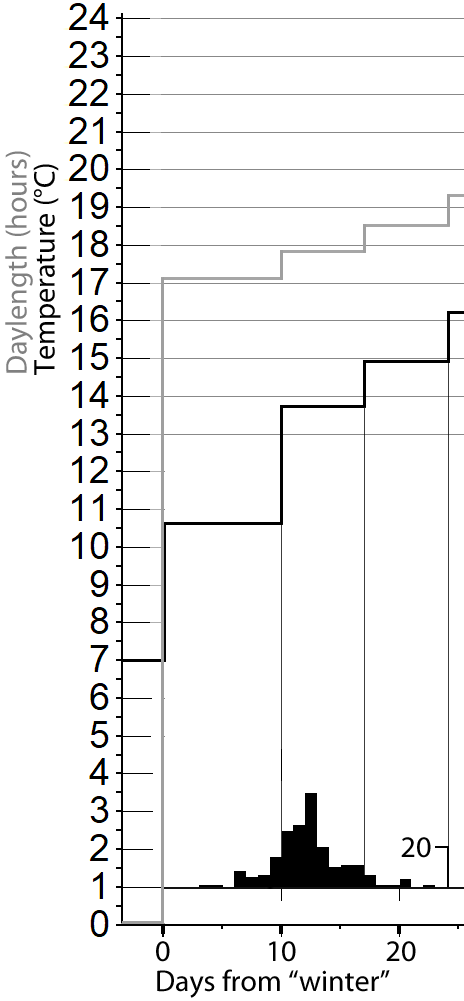


14.9 15.5 24.0 17.1 17.8

**S5:4c** photoperiod/temp
SE 60°N

**Pop. SE 60°N**

**Pop. SE 66°N**

Pop. PL 54°N

Pop. SE 66°N

**Pop. PL 54°N**

**S5:4a** photoperiod/temp
PL 54°N

**S5:4b** photoperiod/temp SE 66°N

**Fig. S5:4a-c**. Data underlying Johansson et al.4. Long winter at 7°C, natural temperatures and photoperiods (civil twilight). Reciprocal Polish/North Swedish populations/photoperiods and a central Swedish population/photoperiod.

**Collection**: 29-30/7 2018 (PL 54, 54°N, 16°E), 1/8 2018 (SE 66, 66°N 22°E), and 23-27/7 2018 (SE 60, 60°N, 17°E). During late August, transfer from summer temperatures to 12.1°C (PL 54), 10°C (SE 66) and 10.1°C (SE 60) for one week [photoperiod 12.08h (PL 54), 11.87h (SE 66) and 12.0h (SE 60)]. Photoperiods with civil twilight. **Wintering:** 7°C and DD for 77 days (PL 54) and 74 days (SE 66 and SE 60), i.e. roughly 11-12 weeks of autumn-winter temperatures. “Spring” on 20/1 2018.

**Comments**: Winter treatment at 7°C and one week at 10-12°C for totally 11-12 weeks should allow some faster diapause development, perhaps comparable with 14, or maybe 19 weeks at 5°C in the present study, where also time to chilling was longer. Post diapause development may take about 3-4 weeks at 7°C.

At 11°C, the approximate post-chilling temperature for the first 10 days, post diapause development could take about one week. Since there are some early, somewhat spread-out hatchings, even on day 2 and 3, some eggs must have completed most of the post-diapause development at 7°C, most in SE 66 and least in SE 60. Also, the overall similar main hatching periods suggest well completed diapause development, as expected from the wintering. Both the PL 54 and SE 66 populations are very similar between the two treatments, but differ from each other in detail, with earlier hatch in SE 66. The small differences between the treatments could partly be related to a late temperature difference.

All eggs hatch relatively synchronously regarding the initially low temperatures, and the well-wintered PL 54 eggs even hatch earlier than previously at higher temperatures and native photoperiods after short wintering (Fig. S5:1a, S5:2a, S5:3b). As expected, these PL 54 eggs in native photoperiod generally hatched at shorter days (15-15.5h) than in the previous studies (16-17h).

The generally earlier hatching in SE 66 eggs could relate to a weaker diapause and faster diapause development, partly through partially initiated post-diapause development during “winter” (early even in PL photoperiod), but also to some “spring” sensitivity to photoperiod, since they are still earlier in the native LL. The hatching peak after five days at 11°C is remarkable. Also, in Fig. S5:2b, with a shorter winter, the big peaks in SE eggs soon after photoperiodic increase in the SE photoperiod may suggest a very fast response to photoperiod.

The Uppsala population in native conditions is similar to PL in native conditions.


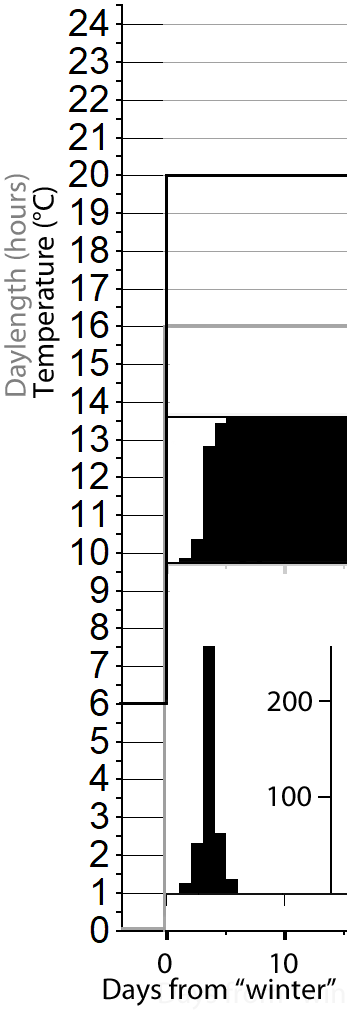

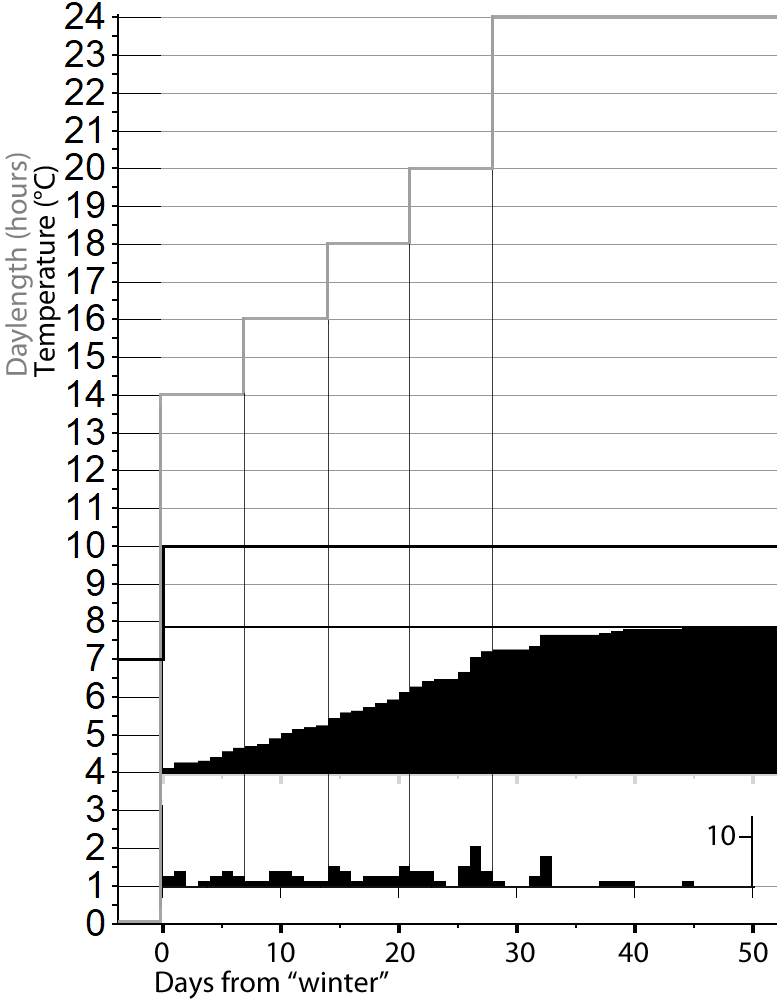


16.0 14.0 16.0 18.0 20.0 24.0

**S5:5b**

**S5:5a**

**Fig. S5:5**. Data from 2025. Population from Uppsala (SE 60). Long winter at 6-7°C, the latter with premature hatching. Constant 20 and 10°C.

**S5:5a.** Sudden constant 20°C at 16h. **Collection** and oviposition: 13-15/8 2024. 20°C until 14/9 (c. 1-2 weeks diapause before chill). **Wintering:** 6°C, DD, to 17/3 2025, 184 days (c. 26 weeks). (Frank Johansson, pers. comm.).

**S5:5b**. Constant 10°C and increasing photoperiod. **Collection** and oviposition: c. 10/8 2024. Shipped to Krakow, Poland, on 12/8 2024. In c. 21°C and 16-16.5h until 25/8., then decreasing temperature and photoperiod until 13/9. **Wintering:** 7°C, DD, until 14/2 2025, i.e. 154 days (22 weeks).

**Comments**: The high synchrony in S5:5a is similar to the 19-21 weeks chilling in Fig. 2-3 at similar photoperiod, but hatching is slightly later, 50% at 3.5 days, compared to 2.5-2.7 days, which may be partly related to the somewhat lower temperature. There is no indication of initiated post-diapause development during wintering.

On the other hand, S5:5b is enigmatic, with remarkably slow hatching. As in S5:6, the long wintering at 7°C produced some winter hatching, in this case 17% of hatched eggs (16 of 94), and there is continuous hatching from day 1. 50% was reached on day 20 excepting winter hatchers. There is a very slight accelerating tendency with increasing photoperiod, but still hatching goes on well after the start of LL photoperiod).

The obvious comparison is the 10°C data with previous 5°C chilling in Fig. 6c-h, col. 2, where 50 % at 16h daylength is on day 21 after 7 weeks chilling, and on day 16 - 13 after 10-19 weeks chill. In Fig. 6 there is no post-chill hatching earlier than day 8 in any conditions. Even Fig. 6j, with previous hatching during a 10°C, DD “wintering”, after just being subjected to 16h light, show some delay and similar synchrony as the chilled eggs, but numbers are low.


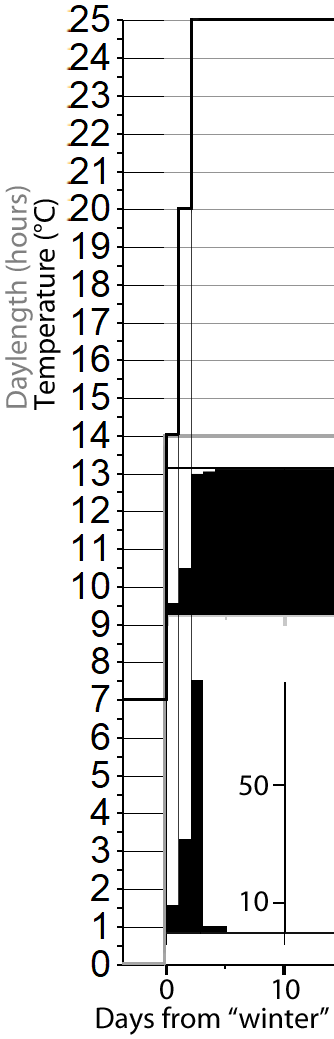

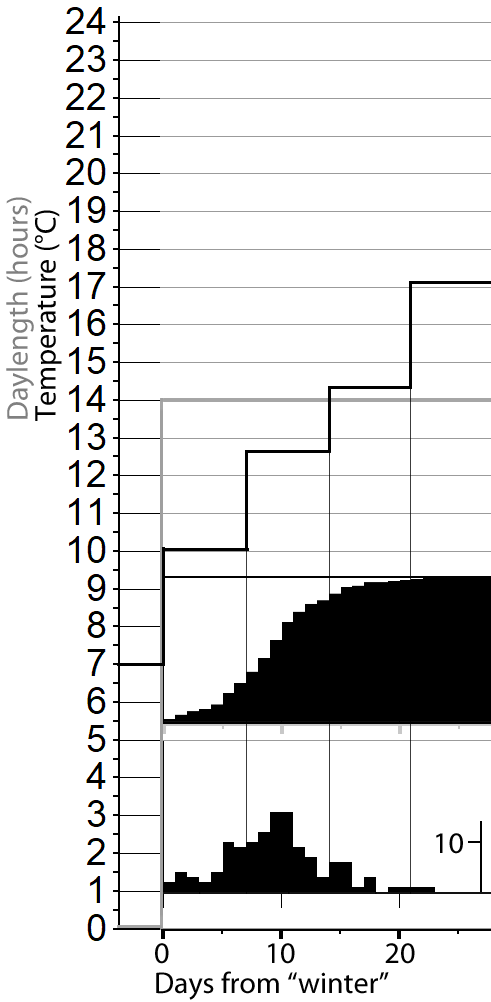


14.0 14.0

**S5:6a**

**S5:6b**

**Fig. S5:6**. Data from 2025. Population from Poland (PL 54). Long winter at 7°C, with premature hatching. Fast and slow spring temperature rise at a 14h daylength.

**S5:6a.** High temperature treatment at 14h.

**S5:6b**. Low temperature treatment at 14h

**Collection**: 6/8 2024, oviposition 7-10/8. In c. 21°C and 16-16.5h until 25 Aug., then decreasing temperature and photoperiod until 13/9. **Wintering:** 7°C, DD, until 14/2 2025, i.e. 154 days (22 weeks or five months).

**Comments**: As in S5:5b, the long wintering at 7°C produced winter hatching, in this case 49% of hatched eggs (247 of 502), and also here shown by continuous hatching from day 1. Compare Supplementary Fig. S4:2c, with a related background.

In S5:6a, the peak on day 3 is similar to Fig. 2h and Fig. 3f, suggesting that many eggs still had not yet initiated post-diapause development. Photoperiod 14h (with civil twilight) is close to that of the likely hatching time.

In S5:6b, the first week at 10°C is comparable to S5:5b, but hatching seems faster, more like the material in Fig. 6, adding to the impression of the responses of the SE 60 population as different. Another remarkable difference between the parallel experiments 5:6b (PL 54) and 5:5b (SE 60) is, contrary to expectations, that PL eggs showed more winter hatching (49%) than the more northern eggs (17%), which can be hypothesised to have a weaker diapause.

References

1. Sniegula, S. & Johansson, F. Photoperiod affects compensating developmental rate across latitudes in the damselfly *Lestes sponsa*. *Ecol Entomol* **35**, 149–157 (2010).

2. Sniegula, S., Drobniak, S. M., Golab, M. J. & Johansson, F. Photoperiod and variation in life history traits in core and peripheral populations in the damselfly *Lestes sponsa*. *Ecol Entomol* **39**, 137–148 (2014).

3. Sniegula, S., Golab, M. J. & Johansson, F. Time constraint effects on phenology and life history synchrony in a damselfly along a latitudinal gradient. *Oikos* **125**, 414–423 (2016).

4. Johansson, F., Watts, P. C., Sniegula, S. & Berger, D. Natural selection mediated by seasonal time constraints increases the alignment between evolvability and developmental plasticity. *Evolution* **75**, 464–475 (2021).
