# Supplementary material for: Maintenance and termination of the embryonic diapause in the univoltine damselfly Lestes sponsa Hansemann
Source: Research Square preprint supplement (doi:10.21203/rs.3.rs-7939953/v1), 2025-11-18
Supplement: Supplementary file 5 [file e14160376bba3ecb20e9cd59.docx]

**Supplement Information 3**

Mortality in different experiments, and complete data for hatching history
of the remaining diapause specimens in the chill-photoperiod experiments
(Fig. 2-3).

**Table S:1**. Summary of successful hatchings, failed hatchings, and dead eggs, in different groups of treatments. Failed hatchings include deformed and/or dead larvae, dead prolarvae, and distinct but partial hatching attempts. For the few Polish eggs, see Fig. S3:1, lower part.

| **Characteristics** | **Results in Fig.** | **Number of eggs** | **Successful hatch** | **Failed hatch** | **Residual eggs/mortality** |
| --- | --- | --- | --- | --- | --- |
| 2015 SE-S long diapause | 2a-e, col. 3-4; S3:1 | 182 | 65 36% | 29 16% | 88 48% |
| 12-week viability control | 4h | 18 | 16 89% | 0 | 2 11% |
| Partial long diapause (12w chill) | 2f, col. 3-4;  S3:1 | 40 | 32 80% | 1 2.5% | 7 17.5% |
| Fast termination | 2a-f, col. 1-2  2g, h | 369 | 360 97.6% | 8 2.17% | 1 0.27% |
|  |  |  |  |  |  |
| 2015 SE-N  Fast | 2i-l, col. 6-7  2l, col. 8 | 110 | 107 97.3% | 1 0.9% | 2 1.8% |
|  |  |  |  |  |  |
| 2016:1, 21°C chill matrix + transfers | 3, S3:2 | 696 | 667 95.8% | 20 2.9% | 9 1.3% |
| Long-day control + early transfer | 4a-b | 86 | 82 95.3% | 1 1.12% | 3 3.5% |
| 2016:2, 21°C | 4c-f | 96 | 92 95.8 | 0 | 4 4.2% |
| All 10°C | 6a-i | 224 | 220 98.2% | 4 1.8% | 0 |
| All 5°C in  2015 SE-S | 7 | 92 | 84 91.3 | 1 1.1% | 7 7.6% |

LD 20:4


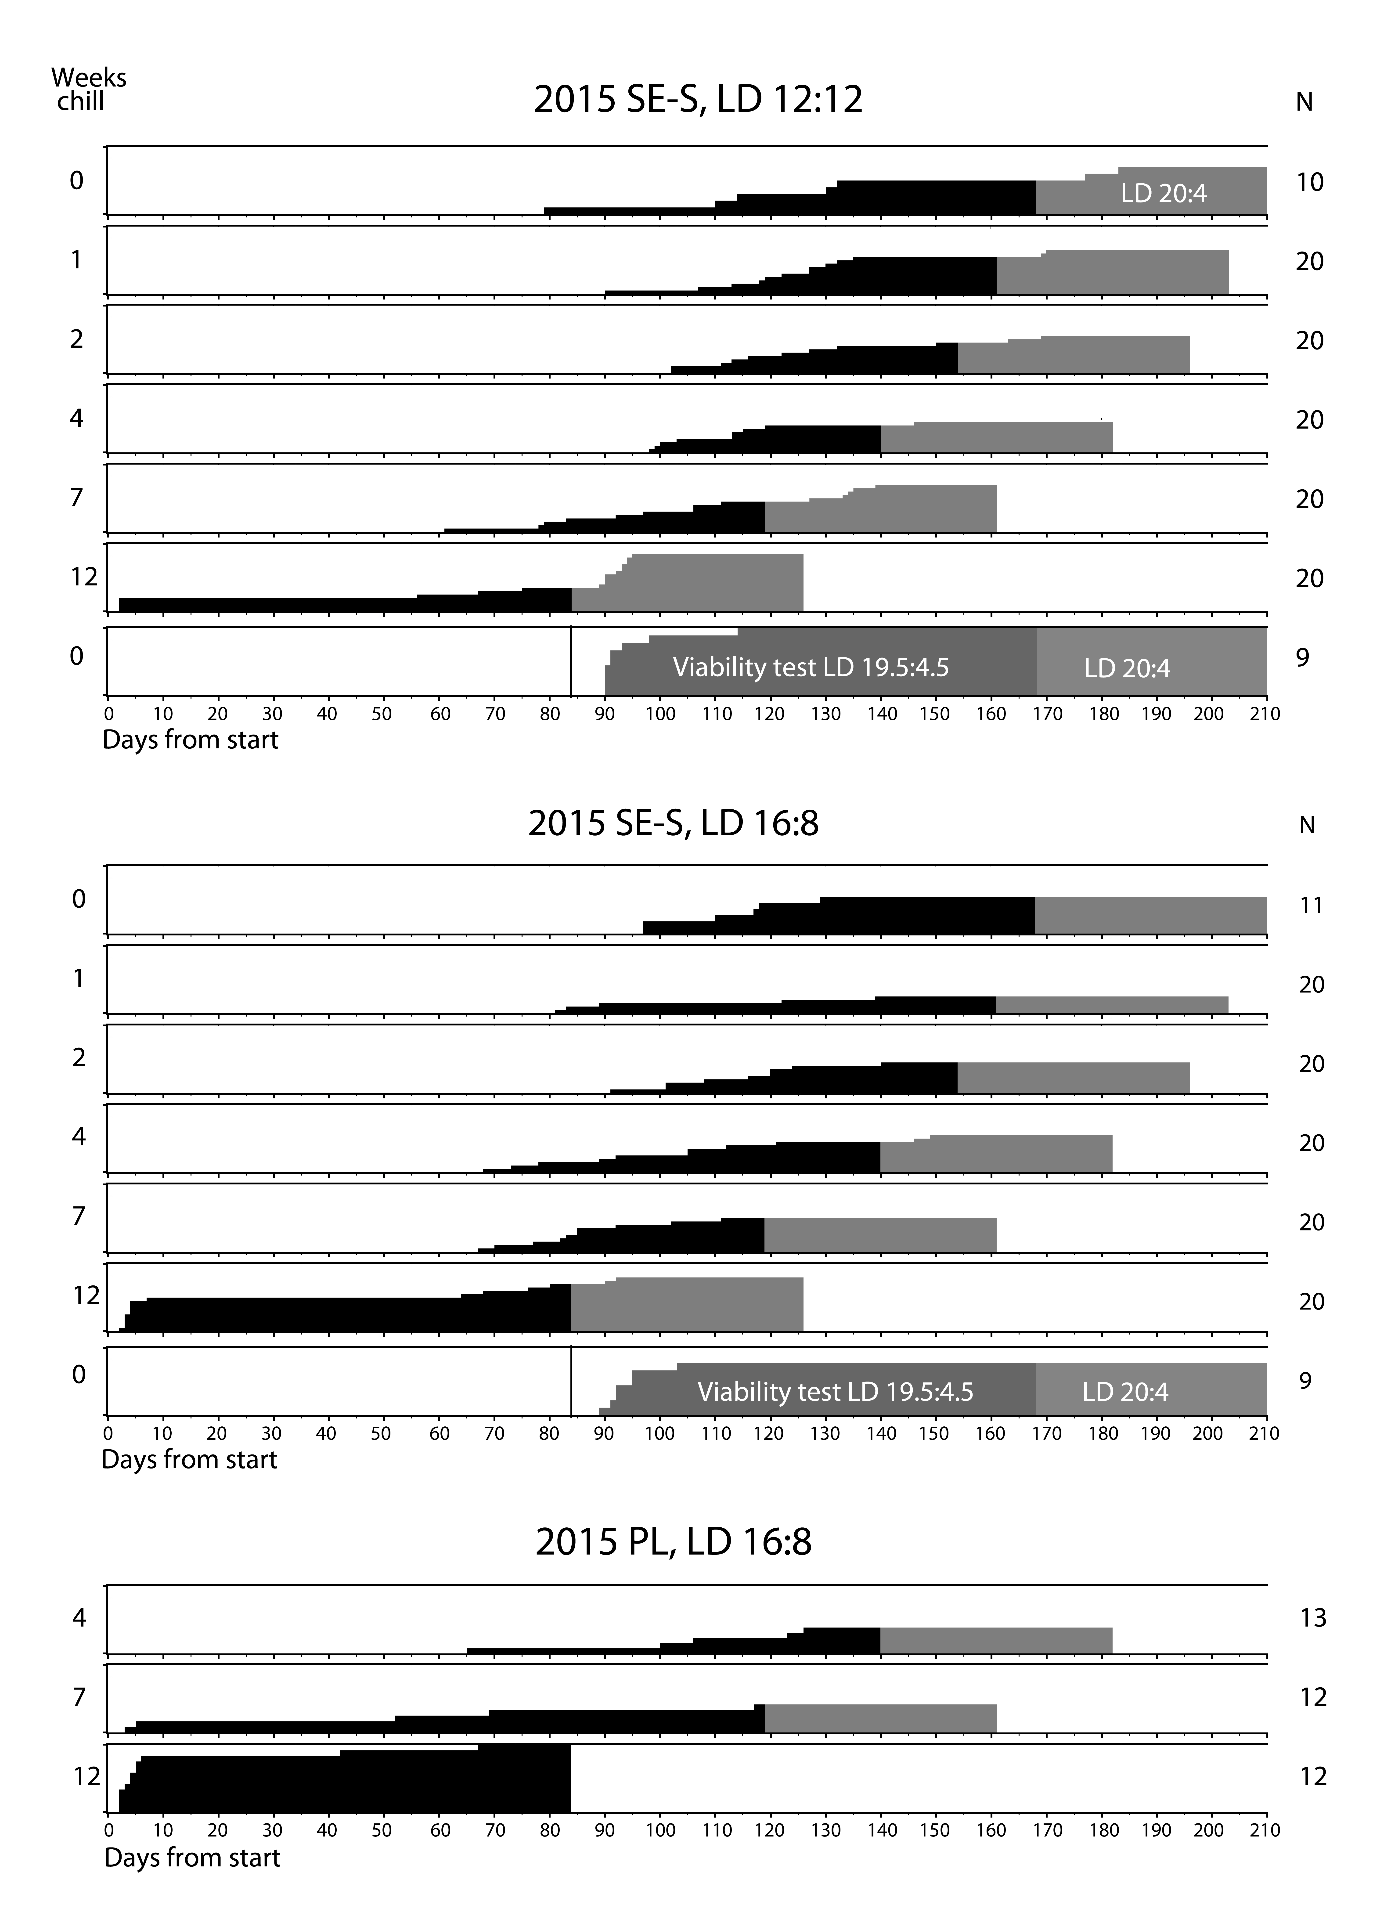


**Fig. S3:1**. Hatching at 21°C (extension of Fig. 2a-f, col.3-5), including distinct hatching attempts, in mostly diapause-maintaining photoperiods (LD 12:12 and LD 16:8) after different chill times, which are shown to the left. Initial number of eggs are shown to the right. Cumulative graphs like Fig.2-4, but for simplicity hatchings are shown squarely with full columns for the inspection interval hatchings were recorded, and not smoothed between days. Start of chilling (5°C) and start of control groups (“0 weeks chill”) on 21 Sept. 2015. Horizontal scale in days from end of chilling. On 7 March 2016 all were transferred to long days (LD 20:4, shown in lighter grey) until final inspection on 18 April, when remaining eggs were considered dead, usually decaying or mouldy. The viability tests of part of the control groups, transferred to LD 19.5:4.5 after 12 weeks (84 days) are shown in darker grey.


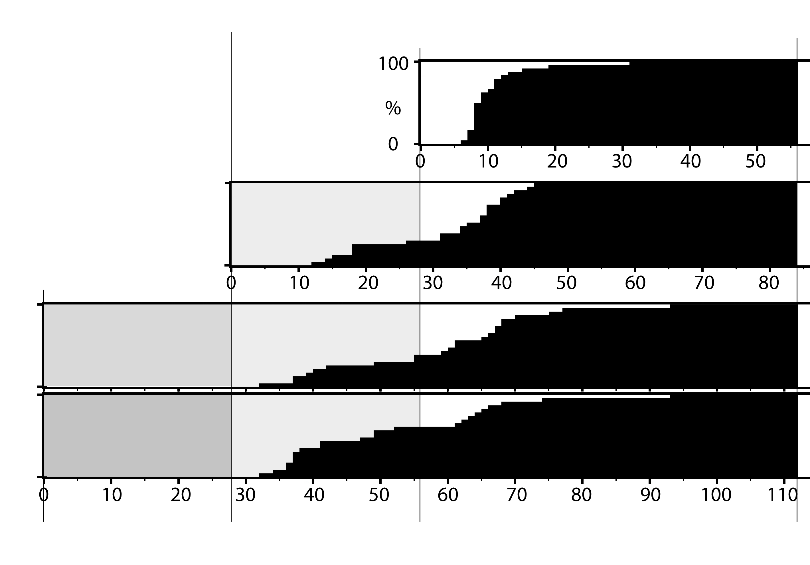

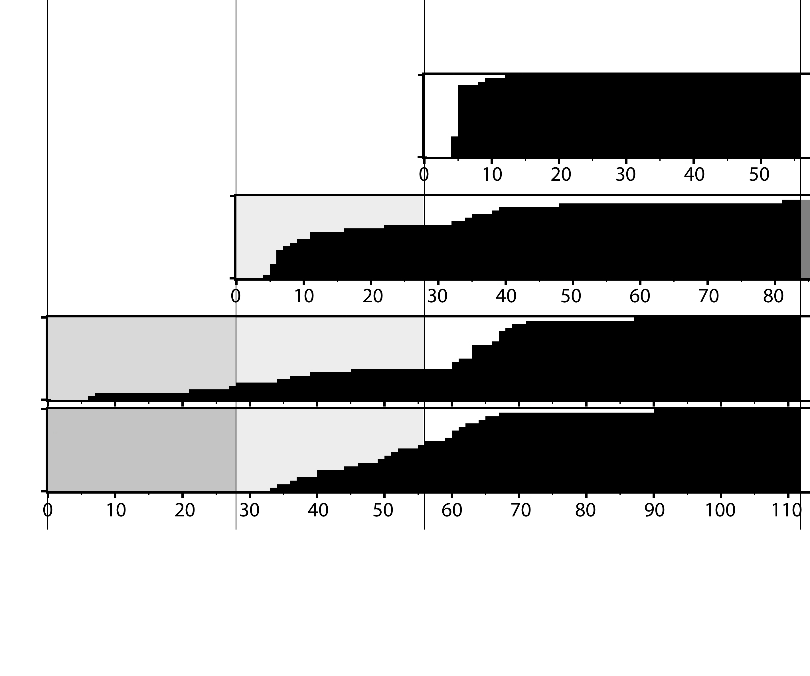


**18:6↓**

**19.5:4.5**

**↓**

**b.** 4 week chill

**a.** Non-chill control

Initial photo-period after

chilling

**19.5:4.5**

**↓**

**18:6↓**

19.5:4.5🡪


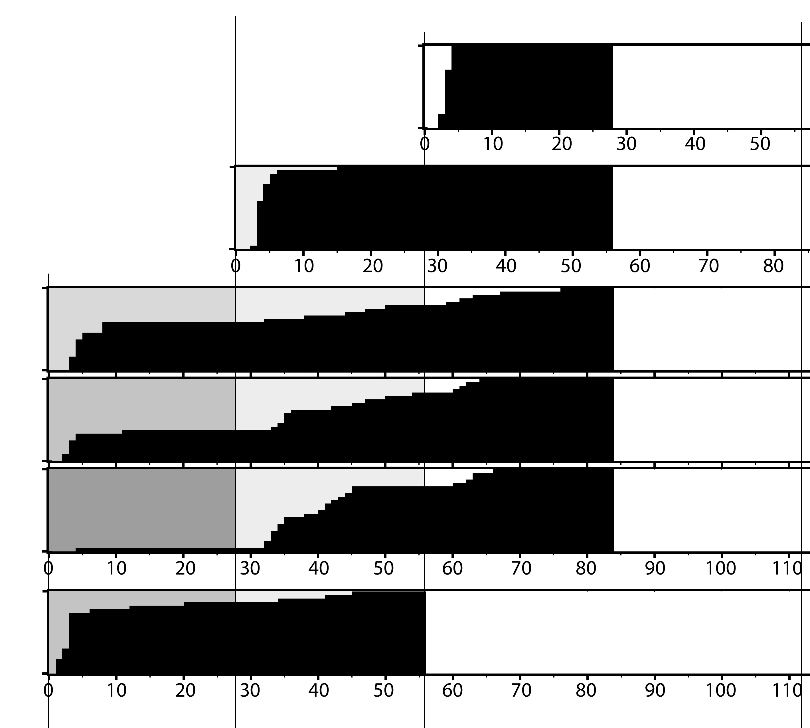

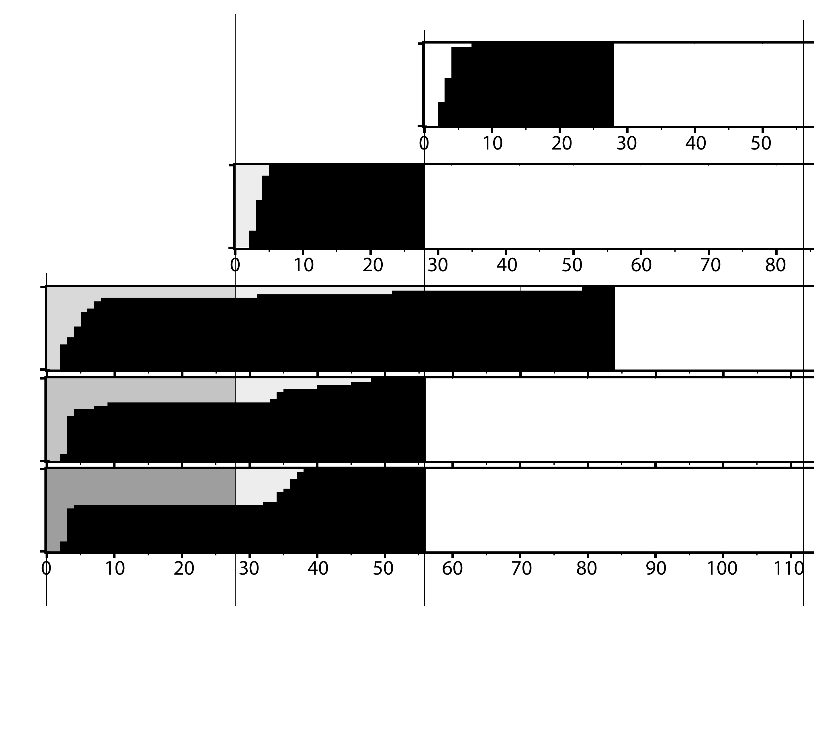

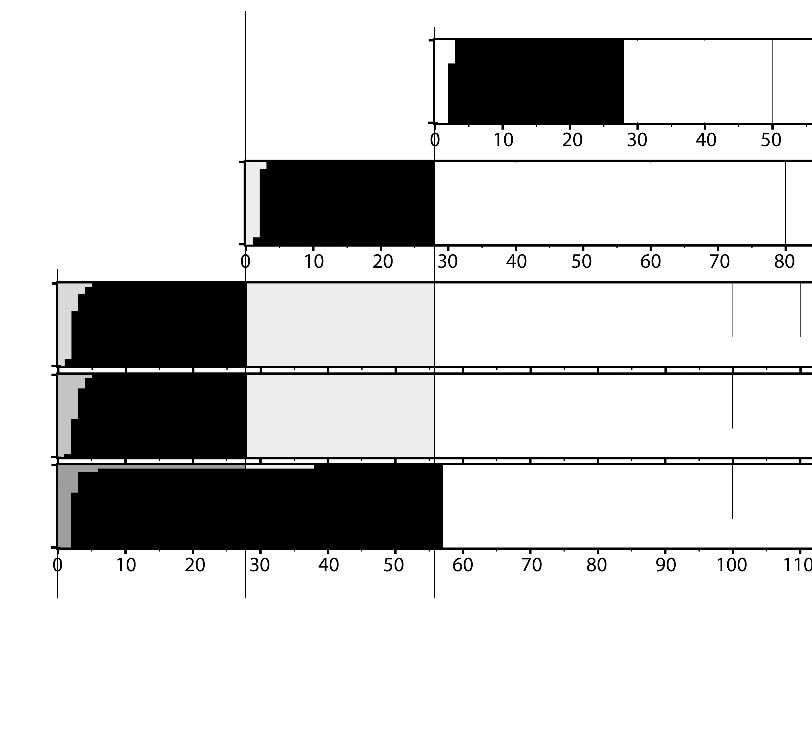

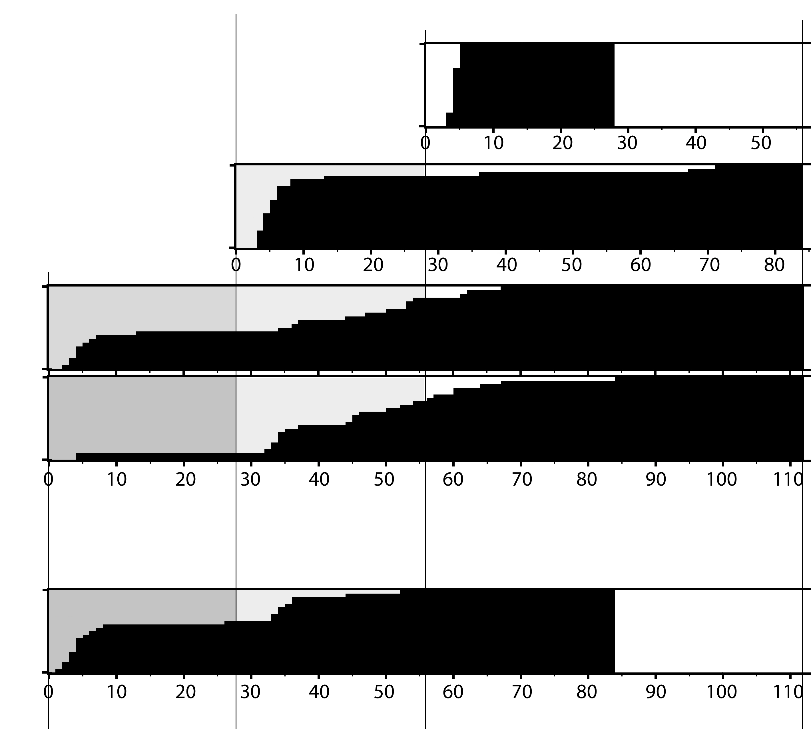


**Figure. S3:2**. Complete hatching history for the 2016:1 chill-photoperiod matrix experiments (Fig. 3), with transfers to longer days from initial photoperiods. Cumulative graphs like Fig.2-4, but for simplicity hatchings are shown squarely with full columns for the inspection interval hatchings were recorded, and not smoothed between days. Photoperiods are coded by shades of grey, labelled to the left. Temperature 21°C, transfer from cold treatment at 5°C and DD at the start except for the non-chill control **(a)**. Two graphs from the 10°C winter treatment are added in **(c)** and **(d)**. The start of treatments (time 0) is preceded by c. 5 weeks in diapause in late-season photoperiods, as illustrated in Fig 1 and Fig. 4g, plus the different periods of chilling.

Last hatch day 118, day 6 after 10°C

17:7

15:9

16:8

**f.** 19 week chill

**e.** 14 week chill

**c.** 7 week chill

**d.** 10 week chill

Days

Weeks 0 4 8 16

18:6🡪

16:8

16:8 From 10°C

15:9🡪

17:7

16:8

17:7

16:8

From 10°C
